# Supplementary material for: Isoforms of the TAL1 transcription factor have different roles in hematopoiesis and cell growth
Source: PubMed Central journal article supplement (PMC10335695; doi:10.1371/journal.pbio.3002175), 2023-06-28

# Raw immunoblots

## Related to Fig 1C

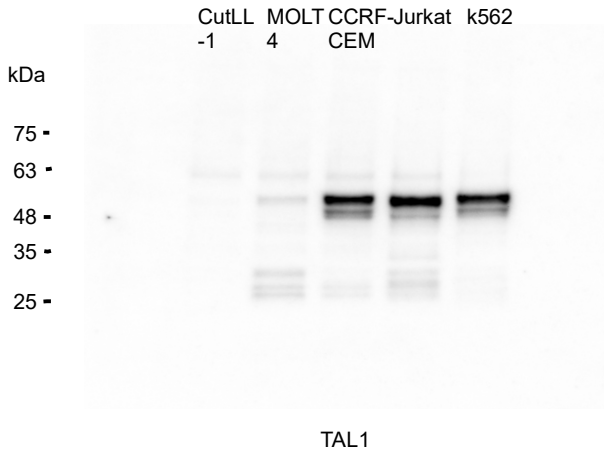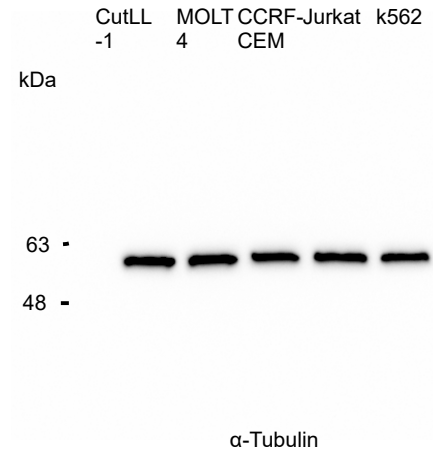

# Related to Fig 4A

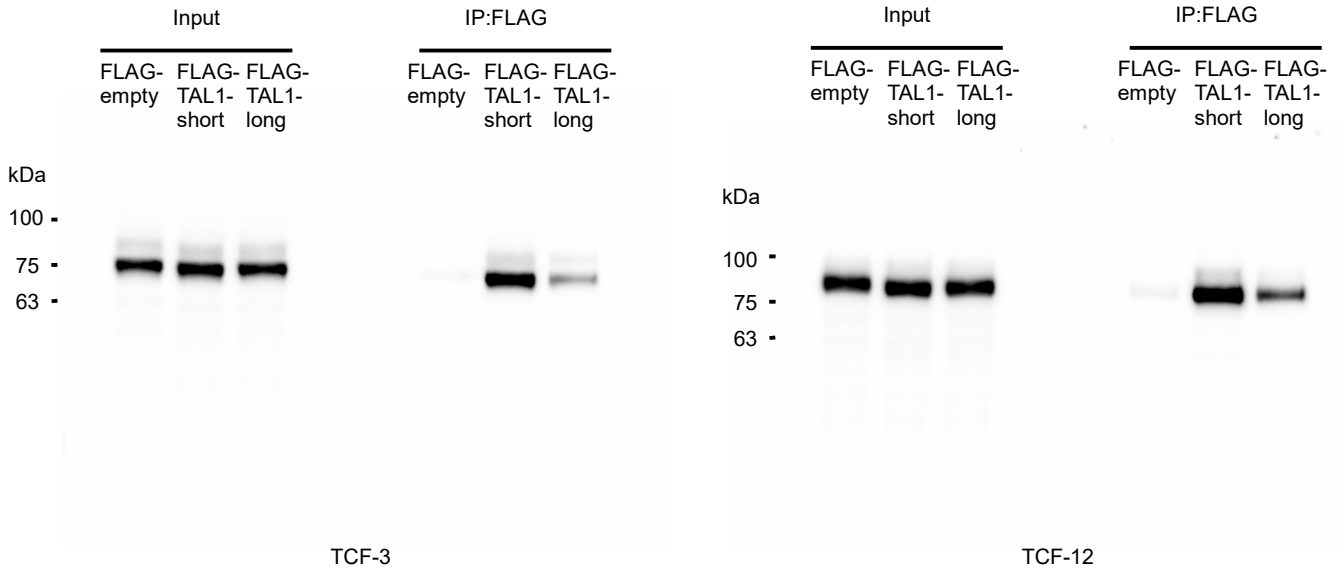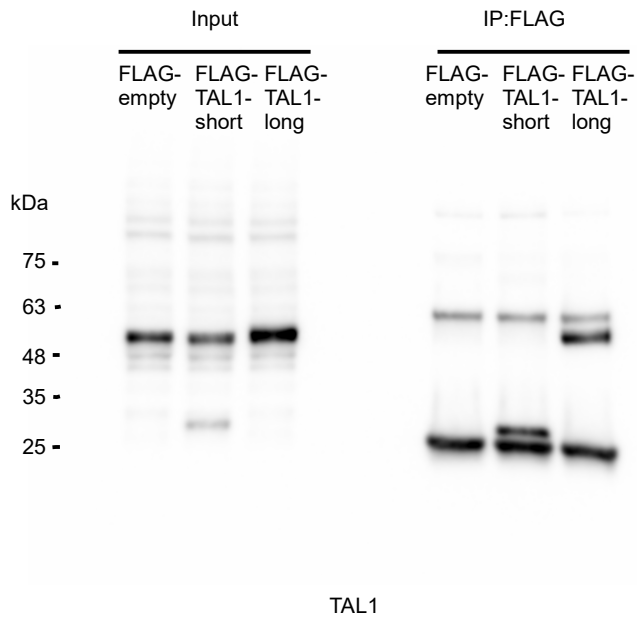

## Related to Supplementary Fig 2C

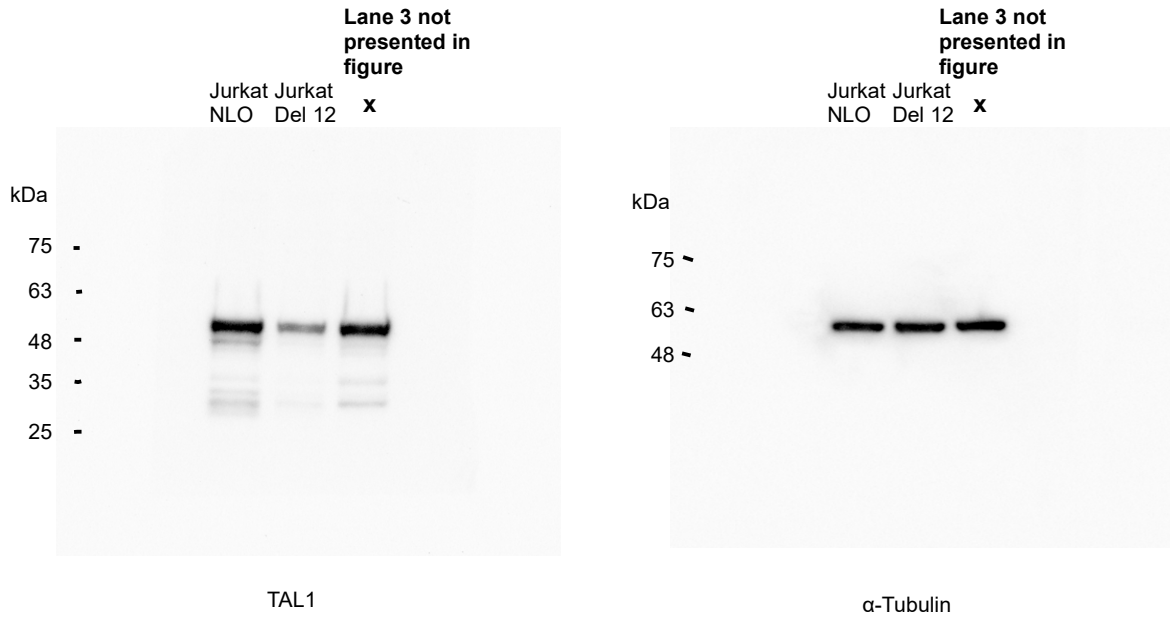

## Related to Supplementary Fig 2F

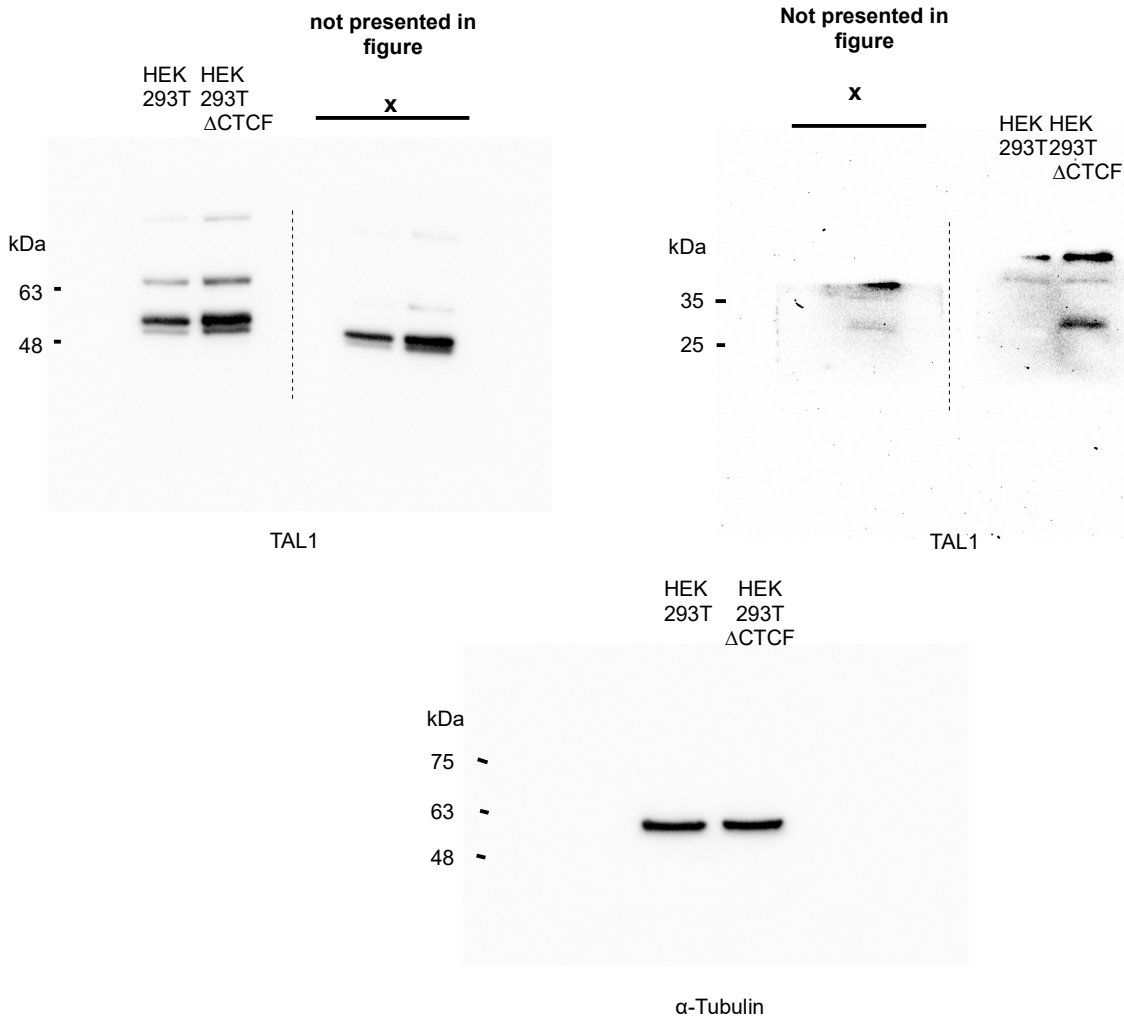

## Related to Supplementary Fig 2H

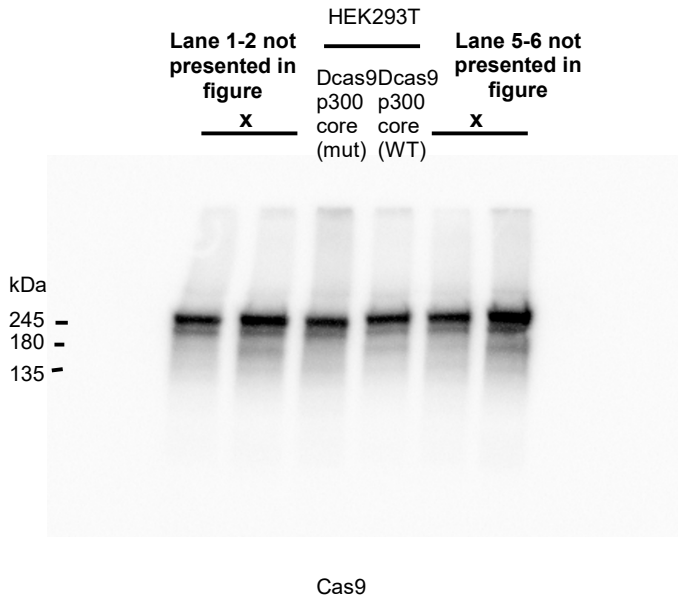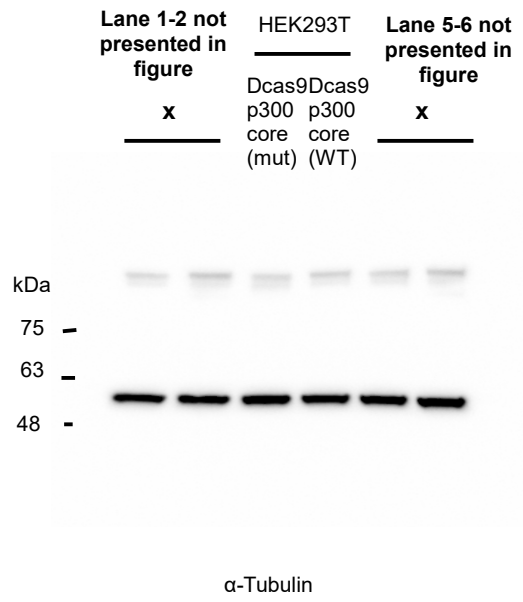

## Related to Supplemental Fig 3B

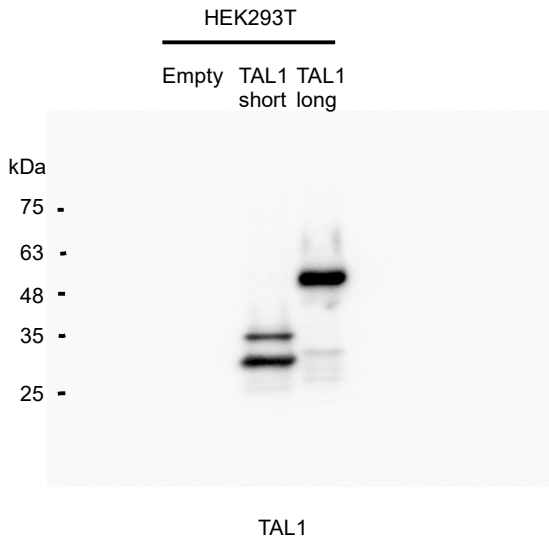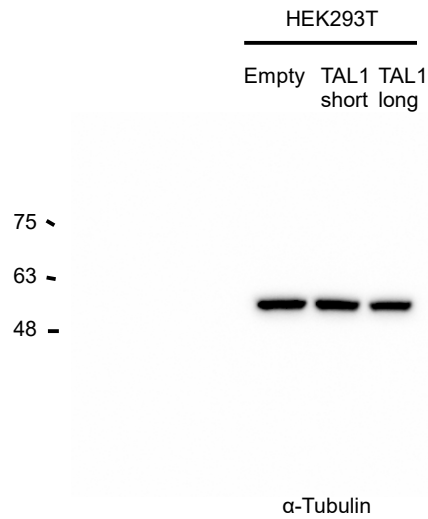

# Related to Supplementary Fig 4A

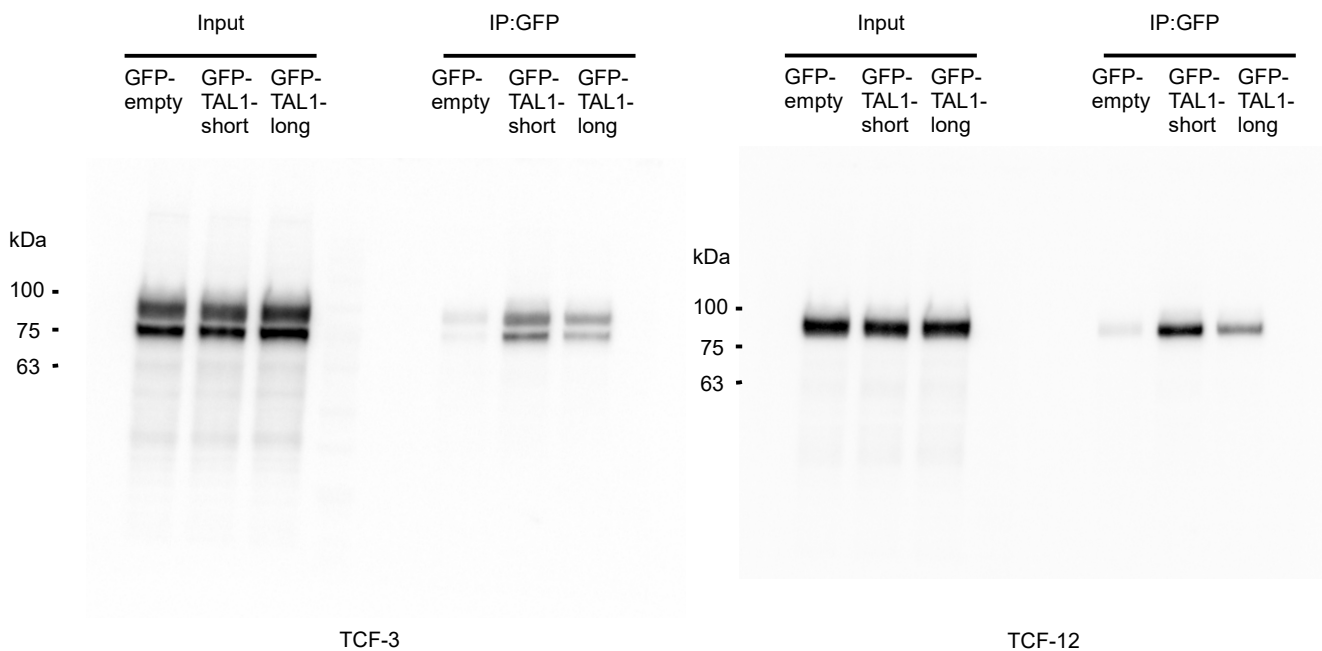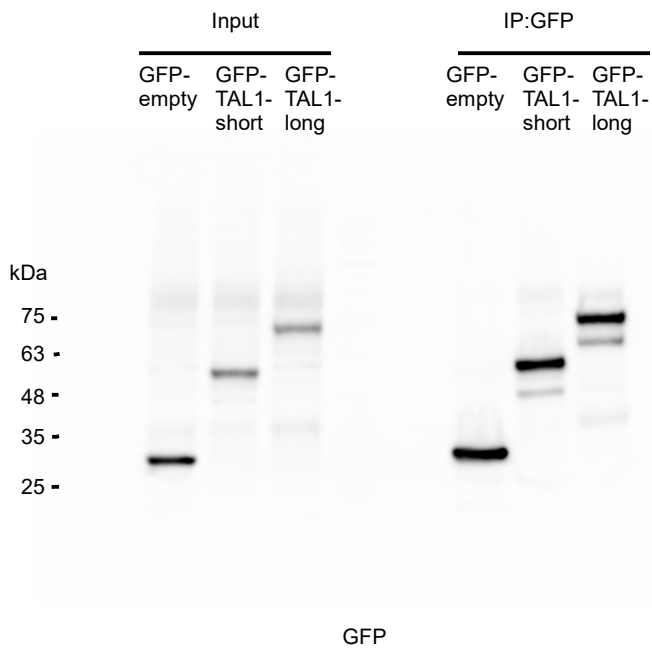

# Related to Supplementary Fig 4B

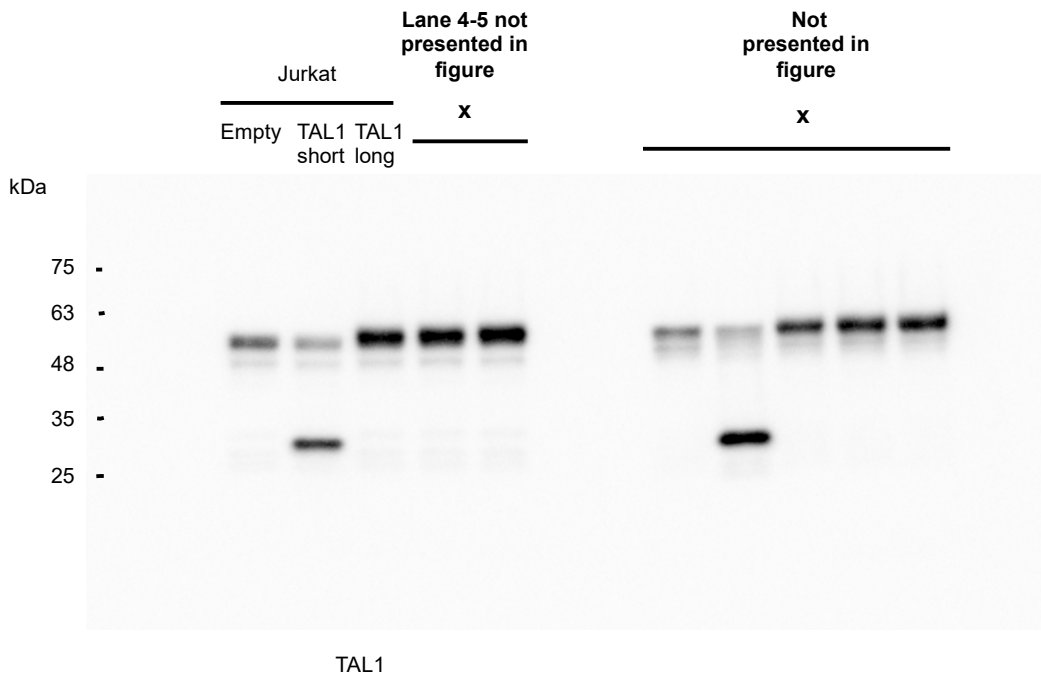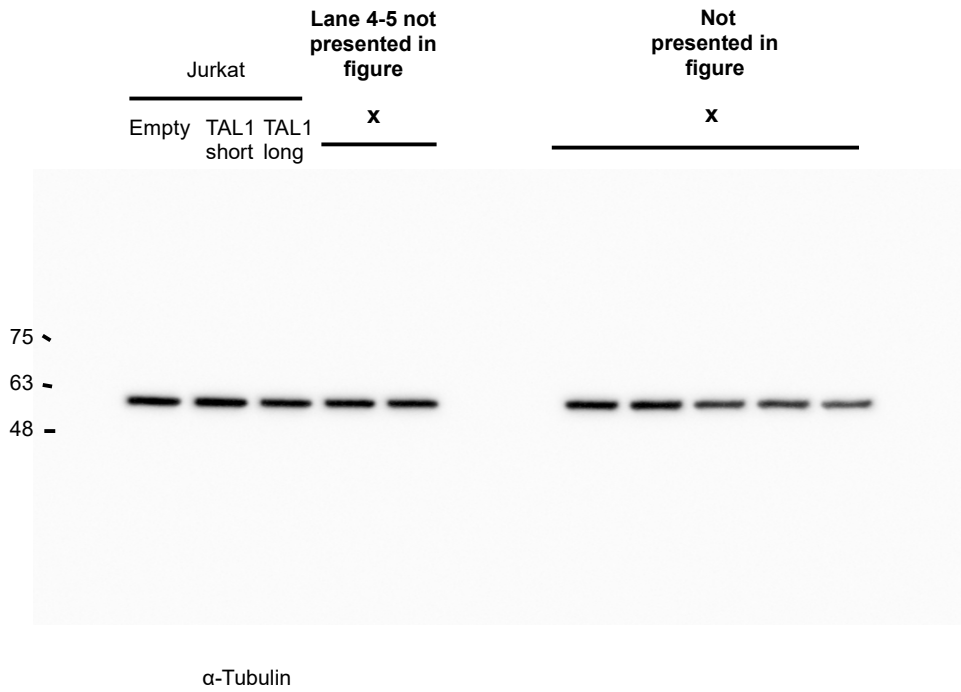

## Related to Supplementary Fig 6B

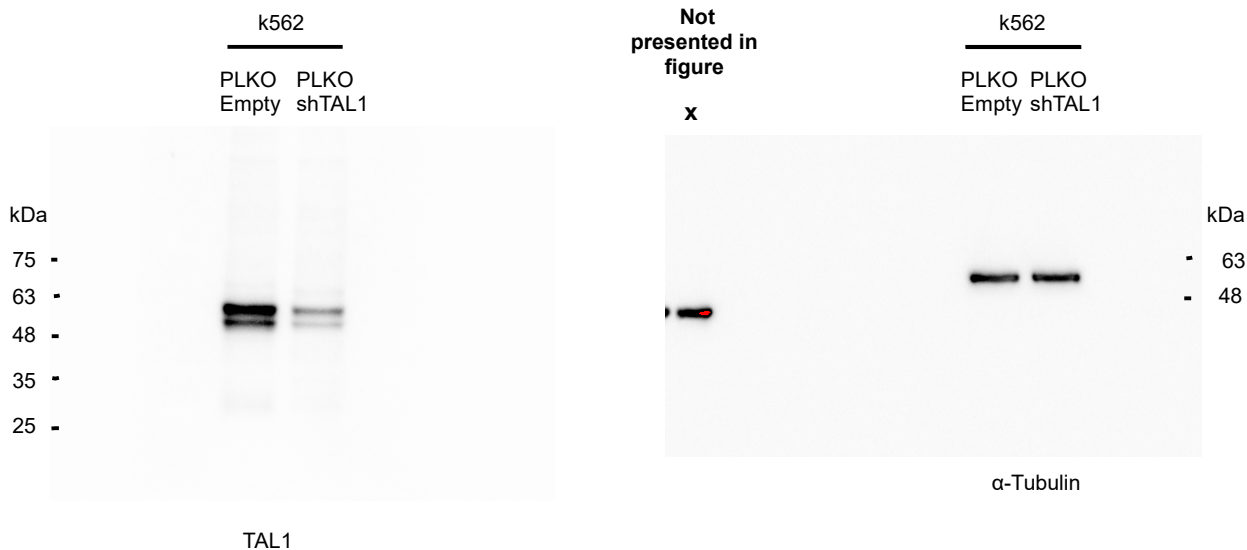

## Related to Supplementary Fig 6C

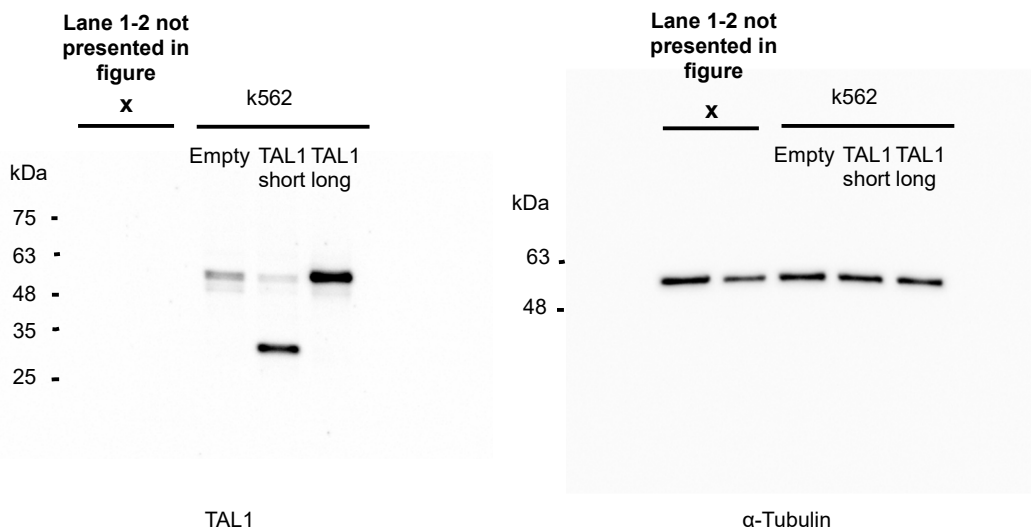

Supplement: pbio.3002175.s007.pdf [file pbio.3002175.s007.pdf]
