# Supplementary material for: Isoforms of the TAL1 transcription factor have different roles in hematopoiesis and cell growth
Source: PubMed Central journal article supplement (PMC10335695; doi:10.1371/journal.pbio.3002175), 2023-06-28
Supplement: pbio.3002175.s008.pdf [file pbio.3002175.s008.pdf]

Supplementary Table S1 Primers used in this study

| Primer name      | Description                                       | Sequence                  |
|------------------|---------------------------------------------------|---------------------------|
| F_CyclophA       | Endogenous control for qPCR                       | GTCAACCCCACCGTGTTCTT      |
| R_CyclophA       |                                                   | CTGCTGTCTTTGGGACCTTGT     |
| F_hTBP           | Endogenous control for qPCR                       | CGCCAGCTTCGGAGAGTTC       |
| R_hTBP           |                                                   | ACAACCAAGATTCACTGTGGATACA |
| F_TAL1_total     | TAL1-total mRNA                                   | GGAGCCGGATGCCTTCCCTAT     |
| R_TAL1_total     |                                                   | GCTCCCGGCTGTTGGTGAAG      |
| F_TAL1_3'TUR     | TAL1 3' UTR                                       | CTAGTGGCTTGTCCCTCACC      |
| R_TAL1_3'TUR     |                                                   | TCACAGGATCTTCCAAACGT      |
| F_TAL1_ΔEx3      | TAL ΔExon 3 mRNA                                  | CTAAATATGCCCCAGCGGGT      |
| R_TAL1_ΔEx3      |                                                   | CATCAGTAATCTCCATCTC       |
| F_TAL1_TSS1-4    | TAL1-long mRNA                                    | AAAAAGGGGGAAAGCAAAGA      |
| R_TAL1_TSS1-4    |                                                   | CCTCTAGCTGGGGGCTCACT      |
| F_TAL1_Exo       | Exogenous+Endogenous TAL1<br>with MIGR1 infection | TGGAGATTACTGATGGTCCCC     |
| R_TAL1_Exo       |                                                   | TCATTCTTGCTGAGCTTCTTGT    |
| F_TSS1           | TAL1 TSS1                                         | TCAGGACCGGGCCTCAAAATG     |
| R_TSS1           |                                                   | GGTGTGGTCCTGGGCGATGTT     |
| F_TSS2           | TAL1 TSS2                                         | CATGCGGTGGGATTGTGAGAATC   |
| R_TSS2           |                                                   | TGAATAGGATCTCCACTCCGCC    |
| F_TSS4           | TAL1 TSS4                                         | AGCGTAACTGCAGGCCTCT       |
| R_TSS4           |                                                   | TGAATAGGATCTCCACTCCGCC    |
| F_Luciferase     | Luciferase mRNA                                   | GGACTTGGACACCGGTAAGA      |
| R_Luciferase     |                                                   | CTTGTCGATGAGAGCGTTTG      |
| F_Renilla        | Renilla mRNA                                      | GGAATTATAATGCTTATCTACGTGC |
| R_Renilla        |                                                   | CTTGCGAAAAATGAAGACCTTTTAC |
| F_gRNA_-60_Enh_1 | gRNA target sequences for -60<br>Enhancer         | CACCGCGGAGTTTAGGGAACCAGA  |
| R_gRNA_-60_Enh_1 |                                                   | AAACTCTGGTTCCTAAACTCCGC   |
| F_gRNA_-60_Enh_2 |                                                   | CACCCTGGTCGTGTTTCGTCCTCGG |
| R_gRNA_-60_Enh_2 |                                                   | AAACCCGAGGACGAACACGACCAG  |
| F_gRNA_-60_Enh_3 |                                                   | CACCGGGACTCGTAGTCTGCGGCT  |
| R_gRNA_-60_Enh_3 |                                                   | AAACAGCCGCAGACTACGAGTCCC  |
| F_gRNA_-60_Enh_4 |                                                   | CACCTTAGCGTGTGCTGATCGTG   |
| R_gRNA_-60_Enh_4 |                                                   | AAACCACGATCAGCGACACGCTAA  |
| F_gRNA_Ex3_1     |                                                   | CACCGCGGCCCTTTAAGTCTCTCG  |

|                     |                                                |                           |
|---------------------|------------------------------------------------|---------------------------|
| R_gRNA_Ex3_1        | gRNA target sequences for TAL1<br>Exon 3       | AAACCGAGAGACTTAAAGGGCCGC  |
| F_gRNA_Ex3_2        |                                                | CACCGCGCCAGTTCGATGACTGG   |
| R_gRNA_Ex3_2        |                                                | AAACCCAGTCATCGAACTGGGCGC  |
| F_gRNA_Ex3_3        |                                                | CACCGAGGACTCAGCTGCACCATG  |
| R_gRNA_Ex3_3        |                                                | AAACCATGGTGCAGCTGAGTCCTC  |
| F_gRNA_Ex3_4        |                                                | CACCCGTCCCGTCCCTCTAGCTGG  |
| R_gRNA_Ex3_4        |                                                | AAACCCAGCTAGAGGGACGGGACG  |
| F_-60_Enhancer_ChIP | TAL1 -60 Enhancer for ChIP PCR                 | GAGGTTAGCGTGTCTGCTGAT     |
| R_-60_Enhancer_ChIP |                                                | AGACACGTTCCGGTGACAGTG     |
| F_TAL1_Exon3_ChIP   | TAL1 Exon 3 for ChIP PCR                       | AGGAGGACGTGGACACCTTC      |
| R_TAL1_Exon3_ChIP   |                                                | CCAGCTAGCGCTGAGTTTCC      |
| F_α_Globin          | Erythroid Lineage markers                      | CTGGAGAGGATGTTCTGTCCTTG   |
| R_α_Globin          |                                                | CAGCTTAACGGTATTTGGAGGTCAT |
| F_β_Globin          |                                                | ACTTCAGGCTCCTGGGCAAC      |
| R_β_Globin          |                                                | GGCCCTTCATAATATCCCCCAG    |
| F_γ_Globin          |                                                | GGACAAGGCTACTATCACAA      |
| R_γ_Globin          |                                                | CAGTGGTATCTGGAGGACAG      |
| F_SLC4A1            |                                                | TGACCGCATCTTGCTTCTGT      |
| R_SLC4A1            |                                                | GTCTTCACCCGCTTGACGTA      |
| F_TRIB2             | TAL1 known Target genes                        | TGGGGACATGCATTCTTCG       |
| R_TRIB2             |                                                | GACCCGAGTCCTCTCTTCGT      |
| F_NFKB1             |                                                | CGCCGCTTAGGAGGGAGA        |
| R_NFKB1             |                                                | CCATTCTGAAGCCGGGTGG       |
| F_NKX3-1            |                                                | CCTCCCTGGTCTCCGTGTA       |
| R_NKX3-1            |                                                | TGTCACCTGAGCTGGCATTAC     |
| F_MLL4              | MLL4 (KMT2D) Lysine<br>methyltransferase 2D    | TGCTATCACAGAAGCCCATG      |
| R_MLL4              |                                                | GGATCAATGATATCTTCTGCAG    |
| F_18SrRNA           | Human 18S rRNA (Endogenous<br>control for CPT) | GGCCCTGTAATTGGAATGAGTC    |
| R_18SrRNA           |                                                | CCAAGATCCAACACTACGAGCTT   |
